# Supplementary material for: Lychee pulp phenolics ameliorate hepatic lipid accumulation by reducing miR-33 and miR-122 expression in mice fed a high-fat diet
Source: Royal Society of Chemistry journal article supplement (doi:10.1039/c6fo01507g), 2017-01-01
Supplement: c6fo01507g1.pdf [file c6fo01507g1.pdf]

Supplemental Table 1. Nutrient composition of the diets

| Formula                               |                |             |                 |             |       |
|---------------------------------------|----------------|-------------|-----------------|-------------|-------|
| Control Diet                          |                |             | High-Fat Diet   |             |       |
| Product #D12450H                      | gm%            | kcal%       | Product #D12451 | gm%         | kcal% |
| Protein                               | 19.2           | 20          | 24              | 20          |       |
| Carbohydrate                          | 67.3           | 70          | 41              | 35          |       |
| Fat                                   | 4.3            | 10          | 24              | 45          |       |
|                                       | Total          | 100         | Total           | 100         |       |
|                                       | kcal/gm        | 3.85        | kcal/gm         | 4.73        |       |
| Ingredient                            | gm             | kcal        | gm              | kcal        |       |
| Casein, 30 Mesh                       | 200            | 800         | 200             | 800         |       |
| L-Cystine                             | 3              | 12          | 3               | 12          |       |
| Corn Starch                           | 452.2          | 1808.8      | 72.8            | 291         |       |
| Maltodextrin 10                       | 75             | 300         | 100             | 400         |       |
| Sucrose                               | 172.8          | 691.2       | 172.8           | 691         |       |
| Cellulose, BW200                      | 50             | 0           | 50              | 0           |       |
| Soybean Oil                           | 25             | 225         | 25              | 225         |       |
| Lard*                                 | 20             | 180         | 177.5           | 1598        |       |
| Mineral Mix S10026                    | 10             | 0           | 10              | 0           |       |
| DiCalcium Phosphate                   | 13             | 0           | 13              | 0           |       |
| Calcium Carbonate                     | 5.5            | 0           | 5.5             | 0           |       |
| Potassium Citrate, 1 H <sub>2</sub> O | 16.5           | 0           | 16.5            | 0           |       |
| Vitamin Mix V10001                    | 10             | 40          | 10              | 40          |       |
| Choline Bitartrate                    | 2              | 0           | 2               | 0           |       |
| FD&C Yellow Dye #5                    | 0.04           | 0           | 0               | 0           |       |
| FD&C Red Dye #40                      | 0.01           | 0           | 0.05            | 0           |       |
| <b>Total</b>                          | <b>1055.05</b> | <b>4057</b> | <b>858.15</b>   | <b>4057</b> |       |

\*Typical analysis of cholesterol in lard = 0.72 mg/gram.

Cited from <http://www.researchdiets.com>
